# Supplementary material
Source: HighWire-hosted journal article supplement (https://jnm.snmjournals.org/highwire/filestream/95149/field_highwire_adjunct_files/0/184309_Supplemental_Data.pdf)
Supplement: 184309_Supplemental_Data.pdf [file 184309_Supplemental_Data.pdf]

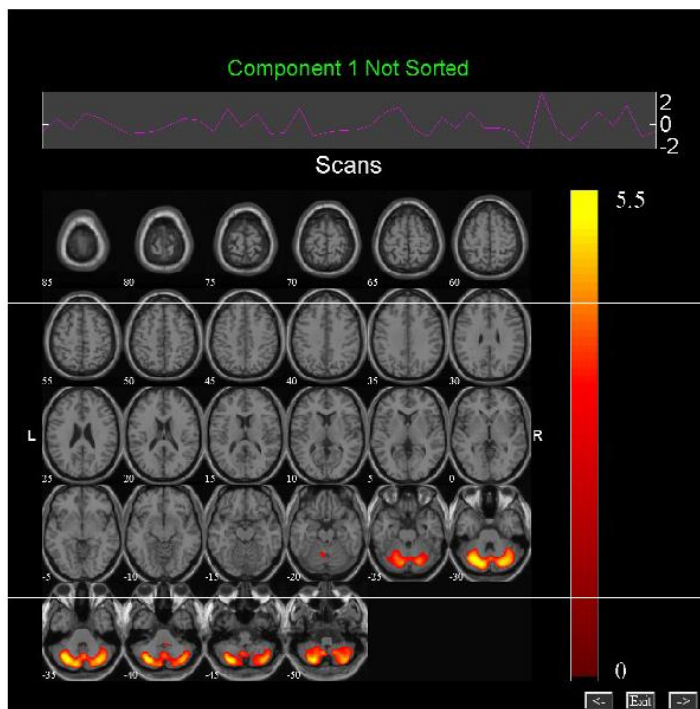

Supplemental Figure 1. Normal aging.

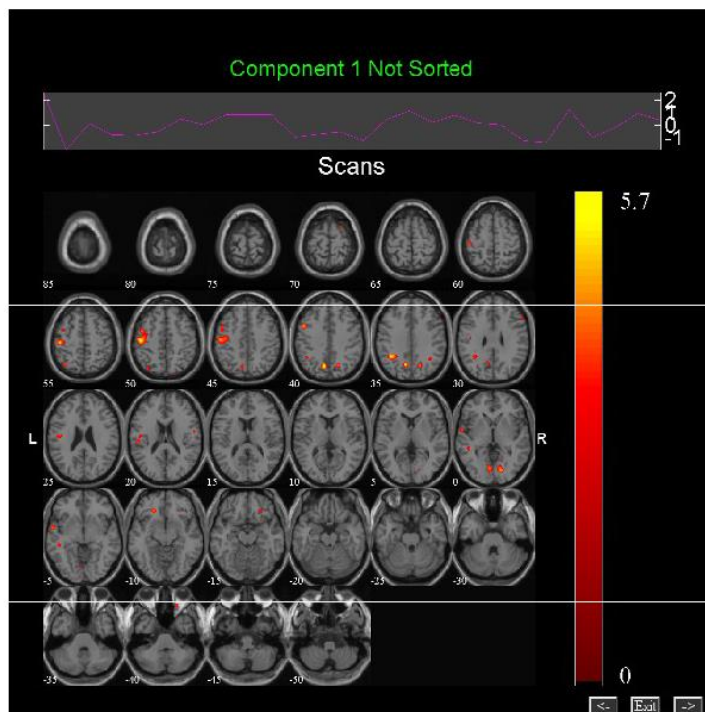

Supplemental Figure 2. Nonconverting MCI.

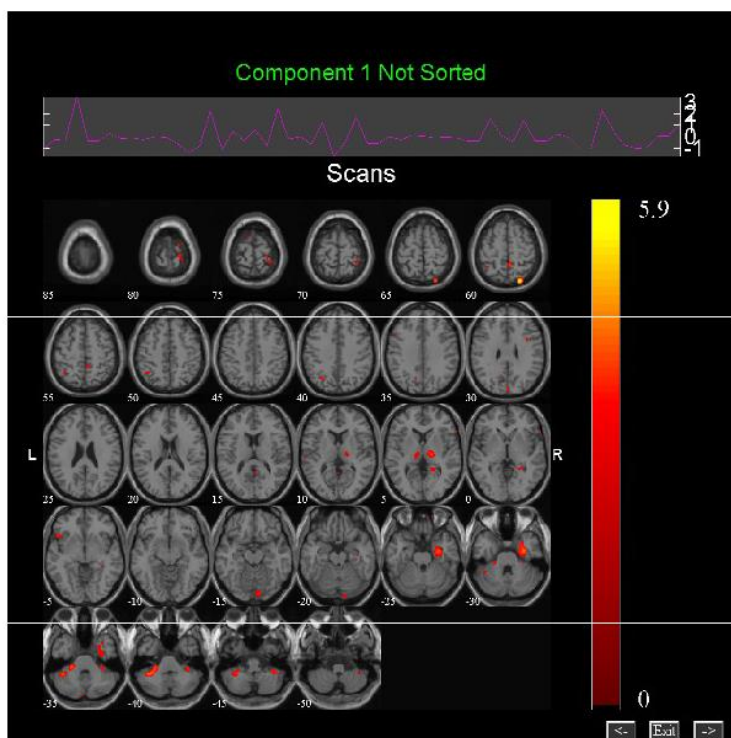

Supplemental Figure 3. MCI converting more than 2 y after PET scan.

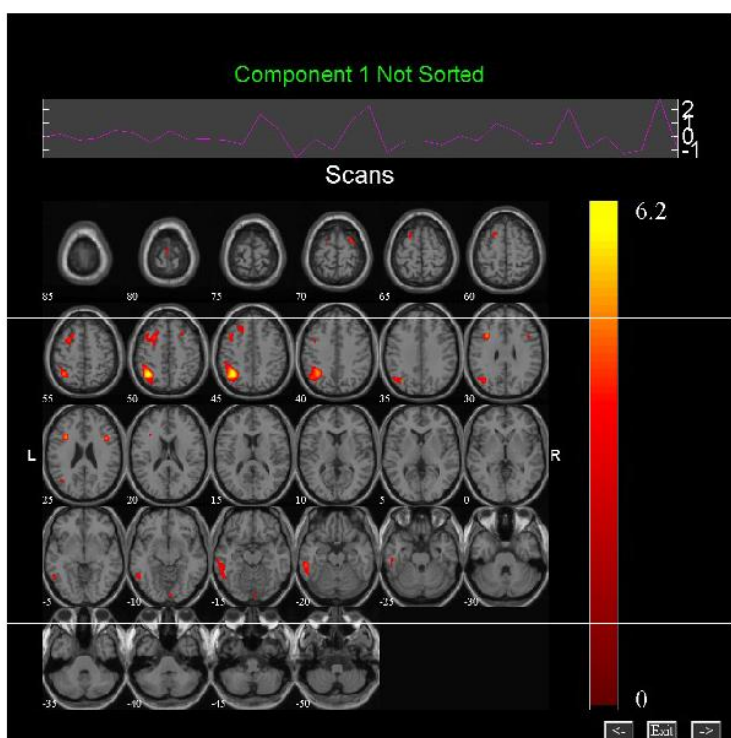

Supplemental Figure 4. MCI converting within 2 y of PET scan.

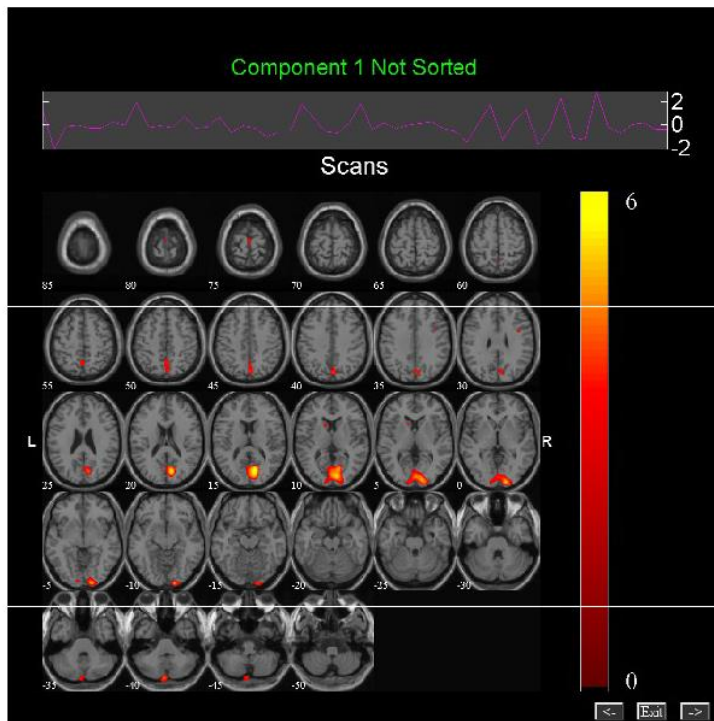

Supplemental Figure 5. AD.
